# Supplementary material for: Dysregulation of cancer genes by recurrent intergenic fusions
Source: Genome Biol. 2020 Jul 6;21:166. doi: 10.1186/s13059-020-02076-2 (PMC7339451; doi:10.1186/s13059-020-02076-2)
Supplement: Supplementary file 2 — Additional file 2: Table S1. Samples IDs for the 268 TCGA samples. [file 13059_2020_2076_MOESM2_ESM.xlsx]

## Sheet: Table S1
Table S1. Samples IDs for the 268 TCGA samples
(RNA-seq data were available for all samples)
TCGA_ID	WGS (T/N)	Tumor type
TCGA-AA-3518	>30X	COAD/READ
TCGA-AA-3534	>30X	COAD/READ
TCGA-AG-3593	>30X	COAD/READ
TCGA-AG-3885	>30X	COAD/READ
TCGA-AA-3977	>30X	COAD/READ
TCGA-A6-6141	>30X	COAD/READ
TCGA-D5-6540	>30X	COAD/READ
TCGA-AZ-6601	>30X	COAD/READ
TCGA-CA-6717	>30X	COAD/READ
TCGA-CA-6718	>30X	COAD/READ
TCGA-A6-6781	>30X	COAD/READ
TCGA-EI-6917	>30X	COAD/READ
TCGA-AD-6964	>30X	COAD/READ
TCGA-AA-A00N	>30X	COAD/READ
TCGA-AA-A00R	>30X	COAD/READ
TCGA-AA-A02Y	>30X	COAD/READ
TCGA-AA-A03F	>30X	COAD/READ
TCGA-NH-A50T	>30X	COAD/READ
TCGA-NH-A50V	>30X	COAD/READ
TCGA-AY-A54L	>30X	COAD/READ
TCGA-A6-A566	>30X	COAD/READ
TCGA-A6-A567	>30X	COAD/READ
TCGA-A6-A56B	>30X	COAD/READ
TCGA-AD-A5EJ	>30X	COAD/READ
TCGA-AD-A5EK	>30X	COAD/READ
TCGA-QG-A5YV	>30X	COAD/READ
TCGA-QG-A5YW	>30X	COAD/READ
TCGA-QG-A5YX	>30X	COAD/READ
TCGA-QG-A5Z1	>30X	COAD/READ
TCGA-QG-A5Z2	>30X	COAD/READ
TCGA-AG-A032	>30X	COAD/READ
TCGA-AG-4015	>30X	COAD/READ
TCGA-AG-4008	>30X	COAD/READ
TCGA-AG-4007	>30X	COAD/READ
TCGA-AG-3901	>30X	COAD/READ
TCGA-AG-3896	>30X	COAD/READ
TCGA-AG-3890	>30X	COAD/READ
TCGA-AG-3727	>30X	COAD/READ
TCGA-AG-3582	>30X	COAD/READ
TCGA-AG-3574	>30X	COAD/READ
TCGA-AF-3913	>30X	COAD/READ
TCGA-AF-2691	>30X	COAD/READ
TCGA-AA-A02O	>30X	COAD/READ
TCGA-AA-A01X	>30X	COAD/READ
TCGA-AA-A01V	>30X	COAD/READ
TCGA-AA-A01T	>30X	COAD/READ
TCGA-AA-A01S	>30X	COAD/READ
TCGA-AA-A01R	>30X	COAD/READ
TCGA-AA-3994	>30X	COAD/READ
TCGA-AA-3956	>30X	COAD/READ
TCGA-AA-3685	>30X	COAD/READ
TCGA-AA-3666	>30X	COAD/READ
TCGA-AA-3664	>30X	COAD/READ
TCGA-AA-3555	>30X	COAD/READ
TCGA-AA-3529	>30X	COAD/READ
TCGA-AA-3516	>30X	COAD/READ
TCGA-AA-3514	>30X	COAD/READ
TCGA-A6-3807	>30X	COAD/READ
TCGA-A6-2683	>30X	COAD/READ
TCGA-A6-2681	>30X	COAD/READ
TCGA-A6-2680	>30X	COAD/READ
TCGA-AO-A03L	>30X	BRCA
TCGA-AO-A03N	>30X	BRCA
TCGA-A2-A04T	>30X	BRCA
TCGA-A2-A04X	>30X	BRCA
TCGA-A8-A075	>30X	BRCA
TCGA-A8-A07B	>30X	BRCA
TCGA-A8-A07I	>30X	BRCA
TCGA-A8-A08L	>30X	BRCA
TCGA-A8-A08S	>30X	BRCA
TCGA-A8-A092	>30X	BRCA
TCGA-A8-A094	>30X	BRCA
TCGA-A8-A09I	>30X	BRCA
TCGA-A8-A09X	>30X	BRCA
TCGA-BH-A0B3	>30X	BRCA
TCGA-BH-A0B9	>30X	BRCA
TCGA-A7-A0CE	>30X	BRCA
TCGA-A2-A0D0	>30X	BRCA
TCGA-A2-A0D1	>30X	BRCA
TCGA-A2-A0D2	>30X	BRCA
TCGA-BH-A0E0	>30X	BRCA
TCGA-A2-A0EY	>30X	BRCA
TCGA-B6-A0I2	>30X	BRCA
TCGA-B6-A0IJ	>30X	BRCA
TCGA-B6-A0IQ	>30X	BRCA
TCGA-AO-A0J2	>30X	BRCA
TCGA-AO-A0J4	>30X	BRCA
TCGA-B6-A0RE	>30X	BRCA
TCGA-B6-A0RU	>30X	BRCA
TCGA-A1-A0SM	>30X	BRCA
TCGA-AR-A0TX	>30X	BRCA
TCGA-BH-A0WA	>30X	BRCA
TCGA-A2-A0YG	>30X	BRCA
TCGA-C8-A12Q	>30X	BRCA
TCGA-C8-A130	>30X	BRCA
TCGA-E2-A14P	>30X	BRCA
TCGA-E2-A152	>30X	BRCA
TCGA-E2-A15E	>30X	BRCA
TCGA-E2-A15H	>30X	BRCA
TCGA-BH-A18R	>30X	BRCA
TCGA-BH-A18U	>30X	BRCA
TCGA-BJ-A28V	>30X	THCA
TCGA-EM-A2CP	>30X	THCA
TCGA-EM-A2CU	>30X	THCA
TCGA-DE-A2OL	>30X	THCA
TCGA-EM-A2OV	>30X	THCA
TCGA-EM-A2OW	>30X	THCA
TCGA-DJ-A2Q1	>30X	THCA
TCGA-FY-A2QD	>30X	THCA
TCGA-EM-A3AL	>30X	THCA
TCGA-EM-A3AQ	>30X	THCA
TCGA-ET-A3DV	>30X	THCA
TCGA-EM-A3FQ	>30X	THCA
TCGA-EL-A3H1	>30X	THCA
TCGA-DE-A3KN	>30X	THCA
TCGA-FK-A3S3	>30X	THCA
TCGA-FK-A3SD	>30X	THCA
TCGA-FK-A3SE	>30X	THCA
TCGA-EL-A3T0	>30X	THCA
TCGA-EL-A3T9	>30X	THCA
TCGA-EL-A3TB	>30X	THCA
TCGA-DJ-A3US	>30X	THCA
TCGA-E8-A418	>30X	THCA
TCGA-BJ-A45K	>30X	THCA
TCGA-ET-A4KN	>30X	THCA
TCGA-DJ-A4UT	>30X	THCA
TCGA-EM-A22O	>30X	THCA
TCGA-BJ-A28T	>30X	THCA
TCGA-EM-A2CN	>30X	THCA
TCGA-DJ-A2Q2	>30X	THCA
TCGA-EL-A3CV	>30X	THCA
TCGA-EL-A3CX	>30X	THCA
TCGA-EM-A3FL	>30X	THCA
TCGA-EL-A3MY	>30X	THCA
TCGA-E8-A416	>30X	THCA
TCGA-L6-A4ET	>30X	THCA
TCGA-EL-A4K6	>30X	THCA
TCGA-FE-A3PD	>30X	THCA
TCGA-DJ-A1QL	>30X	THCA
TCGA-DJ-A13W	>30X	THCA
TCGA-DJ-A13L	>30X	THCA
TCGA-BJ-A0Z2	>30X	THCA
TCGA-EM-A3FR	>30X	THCA
TCGA-DJ-A13R	>30X	THCA
TCGA-DE-A0Y3	>30X	THCA
TCGA-BJ-A191	>30X	THCA
TCGA-FE-A233	>30X	THCA
TCGA-BJ-A0ZB	>30X	THCA
TCGA-G9-7522	>30X	PRAD
TCGA-HC-7737	>30X	PRAD
TCGA-HC-7740	>30X	PRAD
TCGA-HC-7744	>30X	PRAD
TCGA-EJ-7791	>30X	PRAD
TCGA-HC-8258	>30X	PRAD
TCGA-HI-7169	>30X	PRAD
TCGA-HC-7233	>30X	PRAD
TCGA-HC-7075	>30X	PRAD
TCGA-G9-6365	>30X	PRAD
TCGA-G9-6336	>30X	PRAD
TCGA-EJ-5503	>30X	PRAD
TCGA-CH-5789	>30X	PRAD
TCGA-CH-5788	>30X	PRAD
TCGA-CH-5771	>30X	PRAD
TCGA-CH-5750	>30X	PRAD
TCGA-EJ-5506	>30X	PRAD
TCGA-CH-5763	>30X	PRAD
TCGA-G9-6370	>30X	PRAD
TCGA-HC-7079	>30X	PRAD
TCGA-EJ-5504	6-8X	PRAD
TCGA-EJ-5505	6-8X	PRAD
TCGA-EJ-5507	6-8X	PRAD
TCGA-EJ-5525	6-8X	PRAD
TCGA-EJ-5526	6-8X	PRAD
TCGA-EJ-5527	6-8X	PRAD
TCGA-EJ-5530	6-8X	PRAD
TCGA-HI-7170	6-8X	PRAD
TCGA-HI-7171	6-8X	PRAD
TCGA-EJ-5515	6-8X	PRAD
TCGA-EJ-5516	6-8X	PRAD
TCGA-EJ-5517	6-8X	PRAD
TCGA-EJ-5518	6-8X	PRAD
TCGA-CH-5762	6-8X	PRAD
TCGA-CH-5764	6-8X	PRAD
TCGA-CH-5765	6-8X	PRAD
TCGA-CH-5752	6-8X	PRAD
TCGA-CH-5754	6-8X	PRAD
TCGA-CH-5761	6-8X	PRAD
TCGA-EJ-7317	6-8X	PRAD
TCGA-EJ-7327	6-8X	PRAD
TCGA-HC-7080	6-8X	PRAD
TCGA-HC-7081	6-8X	PRAD
TCGA-CH-5741	6-8X	PRAD
TCGA-CH-5743	6-8X	PRAD
TCGA-CH-5744	6-8X	PRAD
TCGA-CH-5745	6-8X	PRAD
TCGA-EJ-5531	6-8X	PRAD
TCGA-EJ-5532	6-8X	PRAD
TCGA-EJ-5542	6-8X	PRAD
TCGA-EJ-7125	6-8X	PRAD
TCGA-G9-6499	6-8X	PRAD
TCGA-HC-7077	6-8X	PRAD
TCGA-G9-6356	6-8X	PRAD
TCGA-G9-6362	6-8X	PRAD
TCGA-G9-6363	6-8X	PRAD
TCGA-G9-6364	6-8X	PRAD
TCGA-EJ-5495	6-8X	PRAD
TCGA-EJ-5496	6-8X	PRAD
TCGA-EJ-5497	6-8X	PRAD
TCGA-EJ-5498	6-8X	PRAD
TCGA-G9-6371	6-8X	PRAD
TCGA-CH-5767	6-8X	PRAD
TCGA-EJ-5502	6-8X	PRAD
TCGA-G9-6343	6-8X	PRAD
TCGA-HC-7211	6-8X	PRAD
TCGA-HC-7212	6-8X	PRAD
TCGA-HC-7213	6-8X	PRAD
TCGA-HC-7230	6-8X	PRAD
TCGA-G9-6373	6-8X	PRAD
TCGA-G9-6378	6-8X	PRAD
TCGA-G9-6384	6-8X	PRAD
TCGA-G9-6385	6-8X	PRAD
TCGA-CH-5746	6-8X	PRAD
TCGA-CH-5748	6-8X	PRAD
TCGA-CH-5751	6-8X	PRAD
TCGA-CH-5772	6-8X	PRAD
TCGA-CH-5790	6-8X	PRAD
TCGA-G9-6332	6-8X	PRAD
TCGA-G9-6348	6-8X	PRAD
TCGA-G9-6329	6-8X	PRAD
TCGA-G9-6333	6-8X	PRAD
TCGA-G9-6338	6-8X	PRAD
TCGA-G9-6342	6-8X	PRAD
TCGA-HC-7231	6-8X	PRAD
TCGA-HC-7232	6-8X	PRAD
TCGA-HI-7168	6-8X	PRAD
TCGA-EJ-7784	6-8X	PRAD
TCGA-EJ-7785	6-8X	PRAD
TCGA-HC-7209	6-8X	PRAD
TCGA-HC-7210	6-8X	PRAD
TCGA-EJ-7328	6-8X	PRAD
TCGA-EJ-7331	6-8X	PRAD
TCGA-EJ-7781	6-8X	PRAD
TCGA-EJ-7782	6-8X	PRAD
TCGA-G9-6351	6-8X	PRAD
TCGA-G9-6353	6-8X	PRAD
TCGA-G9-6361	6-8X	PRAD
TCGA-G9-6377	6-8X	PRAD
TCGA-CH-5766	6-8X	PRAD
TCGA-CH-5768	6-8X	PRAD
TCGA-CH-5769	6-8X	PRAD
TCGA-EJ-5499	6-8X	PRAD
TCGA-EJ-5501	6-8X	PRAD
TCGA-EJ-5512	6-8X	PRAD
TCGA-EJ-5514	6-8X	PRAD
TCGA-G9-6494	6-8X	PRAD
TCGA-G9-6496	6-8X	PRAD
TCGA-CH-5791	6-8X	PRAD
TCGA-CH-5792	6-8X	PRAD
TCGA-CH-5794	6-8X	PRAD
TCGA-EJ-5494	6-8X	PRAD
TCGA-EJ-5508	6-8X	PRAD
TCGA-EJ-5509	6-8X	PRAD
TCGA-EJ-5510	6-8X	PRAD
TCGA-EJ-5511	6-8X	PRAD
TCGA-EJ-5519	6-8X	PRAD
TCGA-EJ-5521	6-8X	PRAD
TCGA-EJ-5522	6-8X	PRAD
TCGA-EJ-5524	6-8X	PRAD
