# Supplementary material for: Dysregulation of cancer genes by recurrent intergenic fusions
Source: Genome Biol. 2020 Jul 6;21:166. doi: 10.1186/s13059-020-02076-2 (PMC7339451; doi:10.1186/s13059-020-02076-2)
Supplement: Supplementary file 3 — Additional file 3: Table S2. Target up-regulating geneUIB fusions, investigated with the scenario in which an intergenic breakpoint is located upstream of a target gene but before the nearest upstream gene. [file 13059_2020_2076_MOESM3_ESM.xlsx]

## Sheet: Table S2
Table S2. Target up-regulating geneUIB fusions, investigated with the scenario in which an intergenic breakpoint is located upstream of a target gene but before the nearest upstream gene.
Target Gene	Fusion Type	Cancer Gene (Bushman Lab)	Tumor Type	Mean expression ratio compare to normal tissue	TCGA ID	Chimeric mRNA production	Recurrent partner	Number of Case
IGF2BP3	geneUIB fusion	No	THCA	93.86	TCGA-EM-A3AL,TCGA-EL-A3H1,TCGA-BJ-A45K,TCGA-BJ-A28V,TCGA-DJ-A1QL,TCGA-DJ-A13W,TCGA-DE-A2OL,TCGA-ET-A3DV	No	Yes (THADA)	8
TOM1L1	geneUIB fusion	No	BRCA	3.6	TCGA-E2-A15H,TCGA-AO-A03L,TCGA-A8-A09I,TCGA-A8-A07B,TCGA-A8-A09X,TCGA-A2-A0EY,TCGA-A2-A04X	No	No	7
CCND1	geneUIB fusion	Yes	BRCA	4.17	TCGA-A1-A0SM,TCGA-BH-A18R,TCGA-A8-A09I,TCGA-A8-A07B,TCGA-A2-A0D0	No	No	5
DDX18	geneUIB fusion	No	BRCA	2.45	TCGA-AO-A0J4,TCGA-B6-A0IJ,TCGA-E2-A14P,TCGA-A2-A0D0,TCGA-A2-A0D2	No	No	5
ETV4	geneUIB fusion	Yes	PRAD	397	TCGA-G9-6371,TCGA-HC-7077,TCGA-CH-5763	Yes	Yes (TMPRSS2)	3
PREP	geneUIB fusion	No	BRCA	11.3	TCGA-E2-A14P,TCGA-A2-A04T,TCGA-C8-A130	No	No	3
WIPF2	geneUIB fusion	No	BRCA	5.37	TCGA-A8-A07B,TCGA-E2-A15H,TCGA-A8-A09I	No	No	3
RGS9	geneUIB fusion	No	BRCA	4.35	TCGA-B6-A0RU,TCGA-E2-A15H,TCGA-B6-A0RE	No	No	3
ABCC3	geneUIB fusion	No	BRCA	2.87	TCGA-A8-A09I,TCGA-A2-A0EY,TCGA-E2-A14P	No	No	3
CDK1	geneUIB fusion	Yes	BRCA	81.65	TCGA-B6-A0IQ,TCGA-B6-A0IJ	No	No	2
CDC6	geneUIB fusion	Yes	BRCA	58.04	TCGA-A2-A0D1,TCGA-A8-A09I	No	No	2
ETV1	geneUIB fusion	Yes	PRAD	54.51	TCGA-CH-5750,TCGA-EJ-5519	No	No	2
BANK1	geneUIB fusion	No	PRAD	13.66	TCGA-HC-7209,TCGA-EJ-5507	No	No	2
ORAOV1	geneUIB fusion	Yes	BRCA	9.57	TCGA-BH-A18R,TCGA-A8-A08S	No	No	2
SRD5A3	geneUIB fusion	No	BRCA	8.22	TCGA-A8-A094,TCGA-C8-A12Q	No	No	2
ADRBK1	geneUIB fusion	No	BRCA	8.11	TCGA-A2-A0D2,TCGA-C8-A12Q	No	No	2
YPEL2	geneUIB fusion	No	BRCA	7.78	TCGA-A8-A09I,TCGA-BH-A18R	No	No	2
LSM14B	geneUIB fusion	No	BRCA	7.77	TCGA-AR-A0TX,TCGA-BH-A0WA	No	No	2
SP6	geneUIB fusion	No	BRCA	7.01	TCGA-AO-A0J2,TCGA-A2-A04X	No	No	2
AP3M2	geneUIB fusion	Yes	BRCA	6.46	TCGA-A8-A07B,TCGA-AR-A0TX	No	No	2
NUP93	geneUIB fusion	No	BRCA	5.58	TCGA-E2-A14P,TCGA-A2-A0D0	No	No	2
IRS2	geneUIB fusion	No	PRAD	5.19	TCGA-HI-7171,TCGA-EJ-5495	Yes/No	No	2
CADM2	geneUIB fusion	No	PRAD	4.5	TCGA-EJ-5519,TCGA-CH-5788	No	No	2
ZNF618	geneUIB fusion	No	PRAD	4.41	TCGA-EJ-5511,TCGA-CH-5751	No	No	2
MAP4K4	geneUIB fusion	No	BRCA	3.99	TCGA-A2-A0D0,TCGA-BH-A0B3	No	No	2
NPNT	geneUIB fusion	No	COAD/READ	3.86	TCGA-AA-3529,TCGA-AZ-6601	No	No	2
AIM1	geneUIB fusion	No	BRCA	3.49	TCGA-C8-A12Q,TCGA-A7-A0CE	No	No	2
RNFT1	geneUIB fusion	No	BRCA	3.24	TCGA-E2-A15H,TCGA-A8-A09I	No	No	2
PPM1D	geneUIB fusion	Yes	BRCA	3.22	TCGA-E2-A15H,TCGA-A8-A09I	No	No	2
RSPO3	geneUIB fusion	Yes	COAD/READ	3.16	TCGA-QG-A5YX,TCGA-AA-3518	Yes	Yes (PTPRK)	2
MDM1	geneUIB fusion	No	BRCA	2.71	TCGA-AR-A0TX,TCGA-A8-A08L	No	No	2
SPATS2L	geneUIB fusion	No	BRCA	2.56	TCGA-AO-A0J2,TCGA-A8-A08L	No	No	2
PTPRG	geneUIB fusion	Yes	PRAD	2.37	TCGA-EJ-5519,TCGA-CH-5752	No	No	2
FBXO3	geneUIB fusion	No	BRCA	2.28	TCGA-A2-A0D2,TCGA-A8-A09I	No	No	2
EGFR	geneUIB fusion	Yes	PRAD	2.16	TCGA-EJ-7331,TCGA-CH-5788	No	No	2
COPS8	geneUIB fusion	No	PRAD	2.12	TCGA-CH-5761,TCGA-CH-5751	No	No	2
PELO	geneUIB fusion	No	BRCA	2.02	TCGA-A8-A075,TCGA-C8-A12Q	No	No	2
MGMT	geneUIB fusion	No	BRCA	1.97	TCGA-C8-A130,TCGA-E2-A14P	No	No	2
MFN2	geneUIB fusion	No	BRCA	1.76	TCGA-BH-A0B3,TCGA-C8-A12Q	No	No	2
HSF2	geneUIB fusion	No	PRAD	1.75	TCGA-EJ-5498,TCGA-G9-6338	No	No	2
TCF7L2	geneUIB fusion	Yes	PRAD	1.58	TCGA-CH-5791,TCGA-CH-5766	No	No	2
DCLK2	geneUIB fusion	No	PRAD	1.44	TCGA-EJ-7782,TCGA-CH-5766	No	No	2
ERG	geneUIB fusion	Yes	PRAD	25.2	TCGA-EJ-5522	Yes	Yes (TMPRSS2)	1
PIK3CA	geneUIB fusion	Yes	PRAD	7.7	TCGA-EJ-5507	Yes	Yes (TBL1XR1)	1
