# Supplementary material for: Dysregulation of cancer genes by recurrent intergenic fusions
Source: Genome Biol. 2020 Jul 6;21:166. doi: 10.1186/s13059-020-02076-2 (PMC7339451; doi:10.1186/s13059-020-02076-2)
Supplement: Supplementary file 4 — Additional file 4: Table S3. Target down-regulating geneUIB fusions, investigated with the scenario in which an intergenic breakpoint is located upstream of a target gene but before the nearest upstream gene. [file 13059_2020_2076_MOESM4_ESM.xlsx]

## Sheet: Table S3
Table S3. Target down-regulating geneUIB fusions, investigated with the scenario in which an intergenic breakpoint is located upstream of a target gene but before the nearest upstream gene.
Target Gene	Fusion Type	Cancer Gene (Bushman Lab)	Tumor Type	Mean expression ratio compare to normal tissue	TCGA ID	Number of Case
UNC5D	geneUIB fusion	No	PRAD	0.81	TCGA-G9-6499,TCGA-G9-6338,TCGA-HC-7213,TCGA-CH-5751,TCGA-EJ-5517,TCGA-HC-7212	6
DUSP26	geneUIB fusion	No	COAD/READ	0.03	TCGA-AG-3582,TCGA-AA-3529,TCGA-AA-A01T,TCGA-AA-A01S	4
EPHA3	geneUIB fusion	Yes	BRCA	0.17	TCGA-A2-A0D1,TCGA-B6-A0IJ,TCGA-A2-A0D2,TCGA-AO-A0J2	4
PABPC4L	geneUIB fusion	No	PRAD	0.32	TCGA-HC-7080,TCGA-HC-7210,TCGA-G9-6338,TCGA-CH-5788	4
LAMA2	geneUIB fusion	No	COAD/READ	0.16	TCGA-AG-3574,TCGA-AA-3518,TCGA-QG-A5YX	3
SLITRK6	geneUIB fusion	No	PRAD	0.17	TCGA-G9-6333,TCGA-EJ-5518,TCGA-HC-7080	3
PGRMC2	geneUIB fusion	No	PRAD	0.29	TCGA-HC-7080,TCGA-EJ-5509,TCGA-G9-6377	3
SLIT2	geneUIB fusion	No	PRAD	0.33	TCGA-CH-5788,TCGA-G9-6496,TCGA-EJ-5496	3
RIN2	geneUIB fusion	No	BRCA	0.57	TCGA-E2-A14P,TCGA-B6-A0IQ,TCGA-A2-A0D2	3
FNTA	geneUIB fusion	No	BRCA	0.6	TCGA-A2-A04X,TCGA-A8-A09I,TCGA-A2-A0D1	3
TET2	geneUIB fusion	Yes	BRCA	0.6	TCGA-B6-A0IJ,TCGA-AO-A0J2,TCGA-E2-A14P	3
SLC13A2	geneUIB fusion	No	BRCA	0	TCGA-A8-A07B,TCGA-E2-A14P	2
PRSS16	geneUIB fusion	No	PRAD	0.03	TCGA-G9-6343,TCGA-CH-5752	2
SDK2	geneUIB fusion	No	BRCA	0.03	TCGA-A8-A07B,TCGA-BH-A18U	2
THSD7A	geneUIB fusion	No	BRCA	0.03	TCGA-A2-A04X,TCGA-A2-A0D1	2
SOX5	geneUIB fusion	Yes	BRCA	0.04	TCGA-E2-A14P,TCGA-B6-A0IJ	2
MRGPRF	geneUIB fusion	No	BRCA	0.06	TCGA-A2-A0D0,TCGA-A8-A08S	2
BEND5	geneUIB fusion	No	BRCA	0.07	TCGA-A2-A0D2,TCGA-A8-A07I	2
POF1B	geneUIB fusion	No	PRAD	0.1	TCGA-EJ-5519,TCGA-G9-6343	2
REEP3	geneUIB fusion	No	COAD/READ	0.1	TCGA-A6-2681,TCGA-AA-A01T	2
FOXO1	geneUIB fusion	Yes	BRCA	0.16	TCGA-A2-A04T,TCGA-B6-A0IQ	2
PTBP2	geneUIB fusion	No	COAD/READ	0.16	TCGA-AG-4015,TCGA-AG-3727	2
STS	geneUIB fusion	No	COAD/READ	0.17	TCGA-A6-2683,TCGA-AA-A01T	2
DYNC1I1	geneUIB fusion	No	PRAD	0.21	TCGA-CH-5750,TCGA-G9-6496	2
FHL2	geneUIB fusion	Yes	PRAD	0.22	TCGA-CH-5767,TCGA-CH-5772	2
RGMB	geneUIB fusion	No	PRAD	0.25	TCGA-HC-7080,TCGA-CH-5788	2
PKP2	geneUIB fusion	No	COAD/READ	0.29	TCGA-AG-4007,TCGA-A6-2681	2
TOX	geneUIB fusion	No	BRCA	0.29	TCGA-E2-A15H,TCGA-C8-A130	2
C10orf107	geneUIB fusion	No	PRAD	0.3	TCGA-HC-7212,TCGA-CH-5761	2
RPL38	geneUIB fusion	No	BRCA	0.32	TCGA-A8-A07I,TCGA-A2-A0YG	2
GLI3	geneUIB fusion	Yes	PRAD	0.35	TCGA-CH-5754,TCGA-G9-6496	2
OXR1	geneUIB fusion	No	PRAD	0.36	TCGA-EJ-7782,TCGA-G9-6338	2
ZSCAN20	geneUIB fusion	No	BRCA	0.39	TCGA-AO-A0J2,TCGA-A2-A04X	2
SORBS3	geneUIB fusion	No	PRAD	0.4	TCGA-HC-7212,TCGA-EJ-5524	2
C6orf203	geneUIB fusion	No	BRCA	0.53	TCGA-A2-A0D0,TCGA-B6-A0IJ	2
RCOR3	geneUIB fusion	No	PRAD	0.59	TCGA-G9-6499,TCGA-EJ-5518	2
CMAS	geneUIB fusion	No	BRCA	0.65	TCGA-A2-A0D1,TCGA-B6-A0IJ	2
