# Supplementary material for: Dysregulation of cancer genes by recurrent intergenic fusions
Source: Genome Biol. 2020 Jul 6;21:166. doi: 10.1186/s13059-020-02076-2 (PMC7339451; doi:10.1186/s13059-020-02076-2)
Supplement: Supplementary file 5 — Additional file 5: Table S4. Target up-regulating geneUIB fusions, investigated with the scenario in which an intergenic breakpoint is located up to 4 Mb upstream of a target gene. [file 13059_2020_2076_MOESM5_ESM.xlsx]

## Sheet: Table S4
Table S4. Target up-regulating geneUIB fusions, investigated with the scenario in which an intergenic breakpoint is located up to 4Mb upstream of a target gene.
Target Gene	Fusion Type	Tumor Type	Mean expression ratio compared to fusion-negative sample in the same tumor type	Mean expression ratio compared to adjacent normal sample in the same tumor type	Case number*	TCGA ID	Chimeric mRNA production	Recurrent partner (gene level)	Recurrent partner (cytoband level)
ANO3	geneUIB fusion	BRCA	23	2.5	7	TCGA-A8-A09I,TCGA-E2-A14P,TCGA-BH-A18U,TCGA-C8-A12Q,TCGA-A2-A0EY,TCGA-A2-A04T,TCGA-B6-A0RU	No	No	Yes (11p14.3)
CHI3L1	geneDIB fusion	BRCA	10	11	4	TCGA-A2-A0D2,TCGA-A2-A0D0,TCGA-AO-A0J4,TCGA-B6-A0IJ	No	No	Yes (1q32.1)
FAM107A	geneUIB fusion	BRCA	13	0.6$	5	TCGA-A2-A0D2,TCGA-A2-A04T,TCGA-BH-A0WA,TCGA-B6-A0RE,TCGA-AO-A0J4	No	No	Yes (3p14.2)
LIPG	geneUIB fusion	BRCA	6	8	4	TCGA-B6-A0IJ,TCGA-B6-A0IQ,TCGA-A2-A0D0,TCGA-A2-A0D2	No	No	Yes (18q21.1)
FUT5	geneUIB fusion	BRCA	11	37	7	TCGA-A2-A0D2,TCGA-BH-A18U,TCGA-A2-A04T,TCGA-A8-A08L,TCGA-B6-A0I2,TCGA-A2-A0D0,TCGA-A7-A0CE	No	No	Yes (19p13.3)
LEP	geneUIB fusion	BRCA	13	0.01$	4	TCGA-C8-A12Q,TCGA-E2-A14P,TCGA-BH-A0B3,TCGA-A7-A0CE	No	No	Yes (7q32.1)
KY	geneUIB fusion	BRCA	10	0.5$	8	TCGA-A2-A04T,TCGA-C8-A12Q,TCGA-A2-A0YG,TCGA-A8-A08L,TCGA-BH-A0E0,TCGA-A2-A0EY,TCGA-AO-A0J4,TCGA-B6-A0RU	No	No	Yes (3q22.2, 3q22.3)
OR1D4	geneDIB fusion	BRCA	Inf	21	4	TCGA-AO-A0J2,TCGA-B6-A0IJ,TCGA-BH-A18U,TCGA-A8-A07B	No	No	No
RGS9	geneUIB fusion	BRCA	8	3.3	4	TCGA-B6-A0RU,TCGA-B6-A0RE,TCGA-A2-A04T,TCGA-A2-A0D1	No	No	No
IGF2	geneUIB fusion	COAD/READ	8	692	5	TCGA-AA-3514,TCGA-AG-3593,TCGA-AA-3534,TCGA-AA-3529,TCGA-AA-A01R	No	No	Yes (11p15.5)
RSPO3	geneUIB fusion	COAD/READ	14	3.2	2	TCGA-QG-A5YX,TCGA-AA-3518	Yes	Yes (PTPRK)	Yes (6q22.33)
ETV4	geneUIB fusion	PRAD	966	397	3	TCGA-G9-6371,TCGA-HC-7077,TCGA-CH-5763	Yes	Yes (TMPRSS2)	Yes (21q22.3)
ERG	geneUIB fusion	PRAD	11	25	1	TCGA-EJ-5522	Yes	Yes (TMPRSS2)	Yes (21q22.3)
PIK3CA	geneUIB fusion	PRAD	5	8	1	TCGA-EJ-5507	Yes	Yes (TBL1XR1)	Yes (3q26.32)
ETV1	geneUIB fusion	PRAD	19	29	4	TCGA-EJ-5519,TCGA-G9-6494,TCGA-CH-5750,TCGA-EJ-5495	No	No	No
IGF2BP3	geneUIB fusion	THCA	106	89	8	TCGA-EM-A3AL,TCGA-EL-A3H1,TCGA-BJ-A45K,TCGA-BJ-A28V,TCGA-DJ-A1QL,TCGA-DJ-A13W,TCGA-DE-A2OL,TCGA-ET-A3DV	No	Yes (THADA)	Yes (2p21)
SIX2	geneDIB fusion	THCA	5	6	6	TCGA-BJ-A28V,TCGA-DE-A2OL,TCGA-EM-A3AL,TCGA-DJ-A13W,TCGA-DJ-A1QL,TCGA-BJ-A45K	No	No	Yes (7p15.3)
* Only cases with target mRNA expression more than 4 times of control median were selected.
$ The cases showing decreased target gene expression in tumor than in adjacent normal tissue were not described in main figure.
