# Supplementary material for: Dysregulation of cancer genes by recurrent intergenic fusions
Source: Genome Biol. 2020 Jul 6;21:166. doi: 10.1186/s13059-020-02076-2 (PMC7339451; doi:10.1186/s13059-020-02076-2)
Supplement: Supplementary file 6 — Additional file 6: Table S5. Nine additional gene-geneUIB fusions that generate chimeric mRNAs. [file 13059_2020_2076_MOESM6_ESM.xlsx]

## Sheet: Table S5
Table S5. Nine additional gene-geneUIB fusions that generate chimeric mRNAs (found as singletons)
Gene-intergenic fusion	Chimeric mRNA	Cancer Type	TCGA ID
AGPAT5-PRSS55(UIB)	AGPAT5-PRSS55	PRAD	TCGA-HC-7080
CASK-EYA2(UIB)	CASK-EYA2	BRCA	TCGA-A8-A08L
CDC27-MYL4(UIB)	CDC27-MYL4	PRAD	TCGA-HC-7213
DNM2-CNN1(UIB)	DNM2-CNN1	COAD/READ	TCGA-AA-3666
EVC-MGST1(UIB)	EVC-MGST1	BRCA	TCGA-AO-A0J2
LOC400927-DNAL4(UIB)	LOC400927-DNAL4	BRCA	TCGA-E2-A14P
NOA1-SPINK2(UIB)	NOA1-SPINK2	BRCA	TCGA-BH-A18U
PTPRD-C9orf92(UIB)	PTPRD-C9orf92	PRAD	TCGA-EJ-5514
TMPRSS2-IRS2(UIB)	TMPRSS2-IRS2	PRAD	TCGA-HI-7171
