# Supplementary material for: Dysregulation of cancer genes by recurrent intergenic fusions
Source: Genome Biol. 2020 Jul 6;21:166. doi: 10.1186/s13059-020-02076-2 (PMC7339451; doi:10.1186/s13059-020-02076-2)
Supplement: Supplementary file 7 — Additional file 7: Table S6. Information for geneUIB/DIB breakpoints and partners in cytoband level. [file 13059_2020_2076_MOESM7_ESM.xlsx]

## Sheet: Table S6
Table S6. Information for geneUIB/DIB breakpoints and partners in cytoband level; *, recurrent partner of geneUIB/DIB fusion in cytoband level.
TCGA_ID	Tumor_type	Fusion	Breakpoint (chromosome)	Breakpoint (position)	Breakpoint (cytoband)	Partner (cytoband)	Interchromosome vs intrachromosome
TCGA-AA-3514	COADREAD	IGF2(UIB)	11	2232933	11p15.5	11p15.5*	Intrachromosome
TCGA-AA-3534	COADREAD	IGF2(UIB)	11	2289249	11p15.5	11p15.5*	Intrachromosome
TCGA-AG-3593	COADREAD	IGF2(UIB)	11	2290262	11p15.5	11p15.5*	Intrachromosome
TCGA-AA-A01R	COADREAD	IGF2(UIB)	11	2717072	11p15.5	10q22.1	Interchromosome
TCGA-AA-3529	COADREAD	IGF2(UIB)	11	5606785	11p15.4	5q31.1	Interchromosome
TCGA-CH-5750	PRAD	ETV1(UIB)	7	14160101	7p21.2	14q21.1	Interchromosome
TCGA-EJ-5519	PRAD	ETV1(UIB)	7	14170364	7p21.2	7p14.1	Intrachromosome
TCGA-EJ-5495	PRAD	ETV1(UIB)	7	17215344	7p21.1	7p15.1	Intrachromosome
TCGA-G9-6494	PRAD	ETV1(UIB)	7	17726394	7p21.1	7p21.3	Intrachromosome
TCGA-EM-A3AL	THCA	IGF2BP3(UIB)	7	23510192	7p15.3	2p21*	Interchromosome
TCGA-EL-A3H1	THCA	IGF2BP3(UIB)	7	23512402	7p15.3	14q31.1	Interchromosome
TCGA-BJ-A45K	THCA	IGF2BP3(UIB)	7	23514999	7p15.3	2p21*	Interchromosome
TCGA-BJ-A28V	THCA	IGF2BP3(UIB)	7	23524707	7p15.3	2p21*	Interchromosome
TCGA-DJ-A1QL	THCA	IGF2BP3(UIB)	7	23526397	7p15.3	2p21*	Interchromosome
TCGA-DJ-A13W	THCA	IGF2BP3(UIB)	7	23527662	7p15.3	2p21*	Interchromosome
TCGA-DE-A2OL	THCA	IGF2BP3(UIB)	7	23533955	7p15.3	2p21*	Interchromosome
TCGA-ET-A3DV	THCA	IGF2BP3(UIB)	probably upstream of IGF2BP3 in RNAseq		7p15.3	2p21*	Interchromosome
TCGA-BJ-A28V	THCA	SIX2(DIB)	2	43604760	2p21	7p15.3*	Interchromosome
TCGA-DE-A2OL	THCA	SIX2(DIB)	2	43571020	2p21	7p15.3*	Interchromosome
TCGA-EM-A3AL	THCA	SIX2(DIB)	2	43567727	2p21	7p15.3*	Interchromosome
TCGA-DJ-A13W	THCA	SIX2(DIB)	2	43541916	2p21	7p15.3*	Interchromosome
TCGA-DJ-A1QL	THCA	SIX2(DIB)	2	43535002	2p21	7p15.3*	Interchromosome
TCGA-BJ-A45K	THCA	SIX2(DIB)	2	43496561	2p21	7p15.3*	Interchromosome
TCGA-A8-A09I	BRCA	ANO3(UIB)	11	25960457	11p14.3	11p14.3*	Intrachromosome
TCGA-A2-A04T	BRCA	ANO3(UIB)	11	25445614	11p14.3	11p14.3*	Intrachromosome
TCGA-B6-A0RU	BRCA	ANO3(UIB)	11	25338706	11p14.3	11p14.3*	Intrachromosome
TCGA-E2-A14P	BRCA	ANO3(UIB)	11	25104339	11p14.3	11p14.3*	Intrachromosome
TCGA-BH-A18U	BRCA	ANO3(UIB)	11	24382478	11p14.3	11p14.1	Intrachromosome
TCGA-C8-A12Q	BRCA	ANO3(UIB)	11	24148416	11p14.3	11p14.3*	Intrachromosome
TCGA-A2-A0EY	BRCA	ANO3(UIB)	11	22600015	11p14.3	11p15.5	Intrachromosome
TCGA-A2-A0D2	BRCA	FUT5(UIB)	19	6076940	19p13.3	19p13.3*	Intrachromosome
TCGA-BH-A18U	BRCA	FUT5(UIB)	19	6380763	19p13.3	19p13.2	Intrachromosome
TCGA-A2-A04T	BRCA	FUT5(UIB)	19	6577233	19p13.3	19p13.3*	Intrachromosome
TCGA-A8-A08L	BRCA	FUT5(UIB)	19	8517619	19p13.2	11p15.4	Interchromosome
TCGA-B6-A0I2	BRCA	FUT5(UIB)	19	8568785	19p13.2	19q13.41	Intrachromosome
TCGA-A2-A0D0	BRCA	FUT5(UIB)	19	8843986	19p13.2	17p11.2	Interchromosome
TCGA-A7-A0CE	BRCA	FUT5(UIB)	19	9168873	19p13.2	19p13.2	Intrachromosome
TCGA-B6-A0RU	BRCA	FUT5(UIB)	19	9638302	19p13.2	20q12	Interchromosome
TCGA-B6-A0IJ	BRCA	LIPG(UIB)	18	46546978	18q21.1	18q21.1*	Intrachromosome
TCGA-A2-A0D0	BRCA	LIPG(UIB)	18	45852670	18q21.1	18q21.1*	Intrachromosome
TCGA-BH-A0B3	BRCA	LIPG(UIB)	18	45736095	18q21.1	18q21.1*	Intrachromosome
TCGA-B6-A0IQ	BRCA	LIPG(UIB)	18	45528234	18q21.1	18q21.1*	Intrachromosome
TCGA-A2-A0D2	BRCA	LIPG(UIB)	18	44423290	18q21.1	18q21.1*	Intrachromosome
TCGA-B6-A0RU	BRCA	RGS9(UIB)	17	63090687	17q23.3	9p24.2	Interchromosome
TCGA-B6-A0RE	BRCA	RGS9(UIB)	17	63065834	17q23.3	14q23.2	Interchromosome
TCGA-A2-A04T	BRCA	RGS9(UIB)	17	63035757	17q23.3	17q24.1	Intrachromosome
TCGA-A2-A0D1	BRCA	RGS9(UIB)	17	62998956	17q23.3	17q23.3	Intrachromosome
TCGA-AO-A0J2	BRCA	OR1D4(DIB)	17	3825800	17p13.2	17p13.2	Intrachromosome
TCGA-B6-A0IJ	BRCA	OR1D4(DIB)	17	3878846	17p13.2	2q24.2	Interchromosome
TCGA-BH-A18U	BRCA	OR1D4(DIB)	17	3893375	17p13.2	17p12	Intrachromosome
TCGA-A8-A07B	BRCA	OR1D4(DIB)	17	5794469	17p13.2	16p11.1	Interchromosome
TCGA-A2-A0D2	BRCA	CHI3L1(DIB)	1	203130351	1q32.1	1q32.2	Intrachromosome
TCGA-A2-A0D0	BRCA	CHI3L1(DIB)	1	202890631	1q32.1	19p13.2	Interchromosome
TCGA-AO-A0J4	BRCA	CHI3L1(DIB)	1	202125342	1q32.1	1q32.1*	Intrachromosome
TCGA-B6-A0IJ	BRCA	CHI3L1(DIB)	1	200756630	1q32.1	1q32.1*	Intrachromosome
